# Supplementary material for: Melanoma Cell Reprogramming and Awakening of Antitumor Immunity as a Fingerprint of Hyper-Harmonized Hydroxylated Fullerene Water Complex (3HFWC) and Hyperpolarized Light Application In Vivo
Source: MDPI journal article supplement (doi:10.3390/nano13030372), 2023-01-17
Supplement: s1 [file s1]

# Melanoma Cell Reprogramming and Awakening of Antitumor Immunity as a Fingerprint of Hyper-Harmonized Hydroxylated Fullerene Water Complex (3HFWC) and Hyperpolarized Light Application *In Vivo*

Milica Markelić <sup>1,\*†</sup>, Marija Mojić <sup>2,†</sup>, Dijana Bovan <sup>2</sup>, Sanja Jelača <sup>2</sup>, Zorana Jović <sup>3</sup>, Milica Purić <sup>4</sup>, Djuro Koruga <sup>3</sup>, Sanja Mijatović <sup>2</sup>, Danijela Maksimović-Ivanić <sup>2,\*</sup>

<sup>1</sup> Faculty of Biology, University of Belgrade, 11000 Belgrade, Serbia

<sup>2</sup> Institute for Biological Research "Siniša Stanković" - National Institute of the Republic of Serbia, University of Belgrade, 11060 Belgrade, Serbia; marija.mojic@gmail.com (M.M.); dijana.draca@ibiss.bg.ac.rs (D.B.); sanjajelaca93@gmail.com (S.J.); sanjamama@ibiss.bg.ac.rs (S.M.)

<sup>3</sup> TFT NanoCenter, 11050 Belgrade, Serbia; zorana.jovic@tftnanocenter.rs (Z.J.); djuro.koruga@gmail.com (D.K.)

<sup>4</sup> ZeptoHyperTech, 11070 Belgrade, Serbia; milica.vuksanovic@zepterhypertech.com

\* Correspondence: milica.markelic@bio.bg.ac.rs (M.M.); nelamax@ibiss.bg.ac.rs (D.M.-I.)

† These authors contributed equally to this work.

## List of contents

Figure S1. Representative micrographs of tumor necrosis area and TUNEL detection of apoptotic cells in the melanoma tissue from HPL, 3HFWC and 3HFWC+HPL-treated mice with syngeneic melanoma.

Figure S2. Representative micrographs of the most significant histopathological alterations in the liver and kidney cortex of HPL, 3HFWC and 3HFWC+HPL-treated mice with syngeneic melanoma.

Table S1. Biochemical urine parameters of HPL, 3HFWC and 3HFWC+HPL-treated mice with syngeneic melanoma

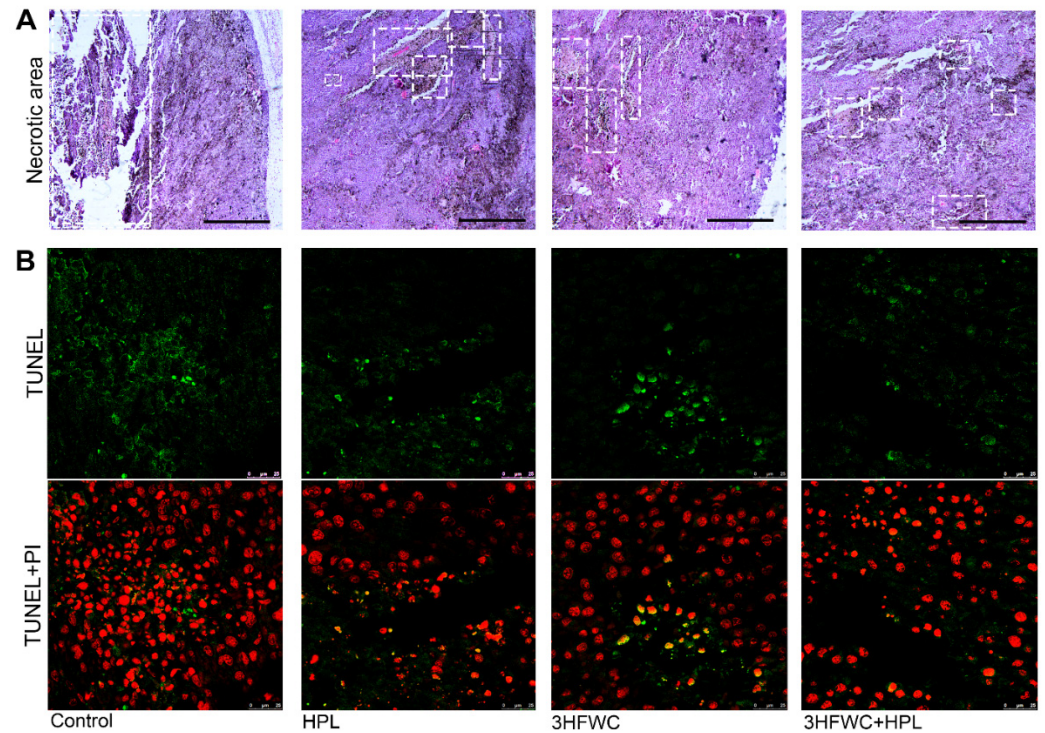

**Figure S1.** Representative micrographs of **A)** tumor necrosis area (squares), HE staining (scale bar and orig. magnification – 500  $\mu\text{m}$ ,  $\times 5$ ); and **B)** TUNEL detection of apoptotic cells (green signal, alone and merged with red PI signal of nuclei; (scale bar and orig. magnification – 25  $\mu\text{m}$ ,  $\times 63$ ); in the melanoma tissue from HPL, 3HFWC and 3HFWC+HPL-treated mice with syngeneic melanoma.

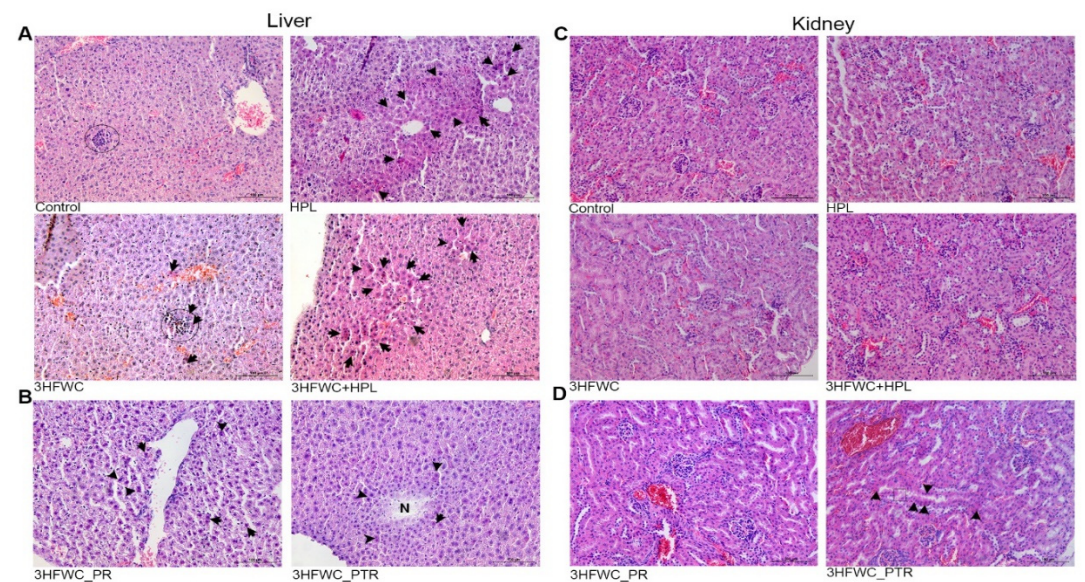

**Figure S2.** Representative micrographs of the most significant histopathological alterations in the **(A, B)** liver and **(C, D)** kidney cortex of HPL, 3HFWC and 3HFWC+HPL-treated mice with syngeneic melanoma. **A)** Liver tissue of animals treated after the melanoma induction; **B)** liver tissue of animals treated with 3HFWC in prophylactic (PR) and combined (prophylactic+therapeutic, PTR) regimen; **C)** Kidney tissue of animals treated after the melanoma induction; **D)** kidney tissue of animals treated with 3HFWC in PR and PTR. Encircled area – immune cells granulomas; arrow-heads – eosinophilic, apoptotic cells; N – necrotic area; square – discontinuation of tubular epithelium. HE staining; scale bar and orig. magnification – 100  $\mu\text{m}$ ,  $\times 10$

**Table S1.** Biochemical urine parameters of HPL, 3HFWC and 3HFWC+HPL-treated mice with syngeneic melanoma.

|                            | <b>Control</b> | <b>3HFWC</b> | <b>HPL</b>   | <b>3HFWC + HPL</b> |
|----------------------------|----------------|--------------|--------------|--------------------|
| Spec. gravity              | 1027 ± 2.7     | 1028 ± 2.7   | 1028.3 ± 2.9 | 1028.3 ± 2.9       |
| pH                         | 5 ± 0          | 5.2 ± 0.4    | 5.7 ± 0.6    | 5 ± 0              |
| Glucose (mmol/L)           | 5.5 ± 0        | 5.5 ± 0      | 5.5 ± 0      | 5.5 ± 0            |
| Nitrite                    | negative       | negative     | negative     | negative           |
| Protein<br>(mg/100ml)      | 40 ± 34.6      | 76 ± 40.4    | 10 ± 0       | 16.7 ± 11.5        |
| Ketones<br>(mg/100ml)      | 8 ± 2.7        | 8.3 ± 2.8    | 8.3 ± 2.9    | 8.3 ± 2.9          |
| Urobilinogen<br>(mg/100ml) | 4.2 ± 2.5      | 3.0 ± 3.0    | 4.0 ± 0      | 2.0 ± 1.7          |
| Bilirubin<br>(mg/100ml)    | 0.8 ± 0.3      | 0.4 ± 0.2    | 0.5 ± 0      | 0.5 ± 0            |
| Blood (RBC/μl)             | negative       | negative     | negative     | negative           |
| Leukocytes<br>(WBC/μl)     | negative       | negative     | negative     | negative           |
